# Supplementary material
Source: PubMed Central journal article supplement (PMC2535814)
Supplement: NIHMS62252-supplement-si20070321_092.pdf [file NIHMS62252-supplement-si20070321_092.pdf]

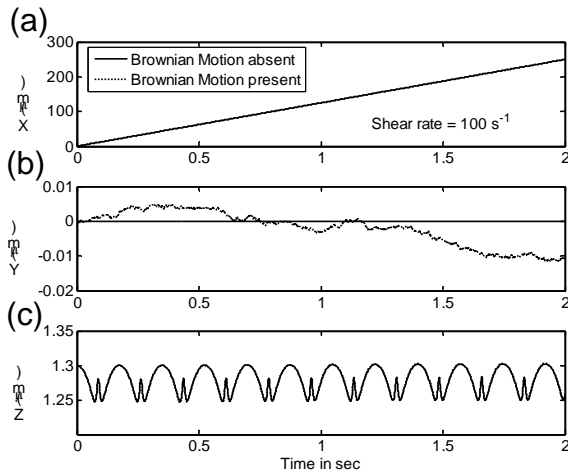

Figure S1. Plots of the (a) X-position (b) Y-position and (c) Z-position of a platelet centroid when flowing in linear shear flow at a shear rate of  $100 \text{ s}^{-1}$ . The platelet has an initial height of  $1.3 \text{ }\mu\text{m}$  and is oriented horizontally at the start of the simulation. The solid line represents the trajectory of a non-Brownian platelet, while the dotted line depicts the translational path for a Brownian platelet. The plots show that Brownian motion does not affect the platelet's trajectories in any significant way in the  $x$ -direction and  $z$ -direction. It also does not affect its rotation frequency. Brownian motion does affect the  $y$ -directional motion of the platelet. However, over the course of distance traveled, the distance moved by the platelet in the  $y$ -direction is 0.004% of the distance covered in the  $x$ -direction and is 1% of the platelet radius. Zero translation of the platelet in the  $y$ -direction as depicted for a non-Brownian platelet is an ideal case, and generally deviations will occur at least due to presence of other particles flowing in the media and also due to non-linearities in the shear rate.
